1 **Hip circumduction is not a compensation for reduced knee flexion angle during gait**

2 Article Type: Original Article

3 Tunc Akbas, PhD, Sunil Prajapati, David Ziemnicki, Poornima Tamma, Sarah Gross, and James

4 Sulzer, PhD

5 Department of Mechanical Engineering, University of Texas at Austin

6

7 Corresponding Author:

8 Tunc Akbas, PhD

9 204 E. Dean Keeton St, Austin, TX 78712

10 [tuncakbas@utexas.edu](mailto:tuncakbas@utexas.edu)

11 512 806 6820

12

13 Keywords: Stroke, Gait, Compensation, Stiff-Knee Gait, Abnormal Coordination, Neural control  
14 of movement

15

16 Word count (Introduction through Discussion): 3,727

## 17 **Abstract**

18 It has long been held that hip abduction compensates for reduced swing-phase knee flexion  
19 angle, especially in those after stroke. However, there are other compensatory motions such as  
20 pelvic obliquity (hip hiking) that could also be used to facilitate foot clearance with greater  
21 energy efficiency. Our previous work suggested that hip abduction may not be a compensation  
22 for reduced knee flexion after stroke. Previous study applied robotic knee flexion assistance in  
23 people with post-stroke Stiff-Knee Gait (SKG) during pre-swing, finding increased abduction  
24 despite improved knee flexion and toe clearance. Thus, our hypothesis was that hip abduction  
25 is not a compensation for reduced knee flexion. We simulated the kinematics of post-stroke  
26 SKG on unimpaired individuals with three factors: a knee orthosis to reduce knee flexion, an  
27 ankle-foot orthosis commonly worn by those post-stroke, and matching gait speeds. We  
28 compared spatiotemporal measures and kinematics between experimental factors within  
29 healthy controls and with a previously recorded cohort of people with post-stroke SKG. We  
30 focused on frontal plane motions of hip and pelvis as possible compensatory mechanisms. We  
31 observed that regardless of gait speed, knee flexion restriction significantly increased pelvic  
32 obliquity ( $2.79^\circ$ ,  $p<0.01$ ) compared to unrestricted walking ( $1.5^\circ$ ,  $p<0.01$ ), but similar to post-  
33 stroke SKG ( $3.4^\circ$ ). However, those with post-stroke SKG had significantly greater hip abduction  
34 ( $8.2^\circ$ ) compared to unimpaired individuals with restricted knee flexion ( $4.2^\circ$ ,  $p<0.05$ ). These  
35 results show that pelvic obliquity, not hip abduction, compensates for reduced knee flexion  
36 angle. Thus, other factors, possibly neural, facilitate exaggerated hip abduction observed in  
37 post-stroke SKG.

## 38 Introduction

39 Stroke causes numerous impairments, including muscle weakness, spasticity, abnormal  
40 muscle coordination and altered proprioception, resulting in walking disorders. Stiff-knee gait  
41 (SKG), defined as reduced peak knee flexion angle during swing phase of the paretic side, is a  
42 common walking disorder following stroke (Deirdre Casey Kerrigan, Gronley, & Perry, 1991).  
43 Gait researchers have long assumed that people with post-stroke SKG compensate for reduced  
44 knee flexion with increased hip hiking, hip circumduction and/or vaulting (D Casey Kerrigan,  
45 Frates, Rogan, & Riley, 2000; Deirdre Casey Kerrigan et al., 1991; Perry & Burnfield, 1992).  
46 However, the causal relations between these compensations and reduced foot clearance have  
47 never been established. Stroke patients exhibit similar or higher foot clearance values  
48 compared to healthy individuals (Little, McGuirk, & Patten, 2014; Matsuda et al., 2017)  
49 suggesting one or more of these aforementioned compensations could be redundant. It is a  
50 commonly held belief that hip abduction, the main frontal plane component of hip  
51 circumduction, compensates for lack of knee flexion (Perry & Burnfield, 1992). However, the  
52 substantial energetic cost of hip abduction (Shorter, Wu, & Kuo, 2017) could make it the least  
53 desirable compensatory motion. Thus, in this work we investigated the necessity of hip  
54 abduction as a compensatory motion for reduced knee flexion.

55 Our previous work suggests excessive hip abduction may not be a compensation, but  
56 possibly the result of an abnormal coordination pattern emerging after stroke. We used a knee  
57 flexion torque assistance during pre-swing and observed an increased hip abduction angle  
58 during swing, instead of the expected reduction, in people with post-stroke SKG (Sulzer,  
59 Gordon, Dhaher, Peshkin, & Patton, 2010). The exaggerated hip abduction despite increased

60 foot clearance suggested that abduction was not acting as a gait compensation. Other possible  
61 causes such as loss of balance, spasticity and reduced proprioception could not account for this  
62 phenomenon. Rather, excessive hip abduction could be part of a cross-planar abnormal  
63 coordination pattern, for example, reflex-based (Finley, Perreault, & Dhafer, 2008) or voluntary  
64 synergies (Cruz & Dhafer, 2008; Cruz, Lewek, & Dhafer, 2009; Neckel, Blonien, Nichols, &  
65 Hidler, 2008). Descriptive analyses of post-stroke gait have associated abnormal coordination  
66 with gait dysfunction. For instance, Clark et al. used non-negative matrix factorization to show  
67 that the number of coordination patterns in post-stroke negatively correlates with locomotor  
68 performance and clinical assessments compared to healthy individuals (Clark, Ting, Zajac,  
69 Neptune, & Kautz, 2010). Cases with fewer modules observed abductor activity coupled with  
70 sagittal plane muscles. Thus, accumulating evidence points to post-stroke hip abduction as part  
71 of abnormal coordination.

72 The concept of hip abduction in post-stroke SKG as an abnormal coordination pattern would  
73 be at odds with the widely accepted hypothesis that hip abduction is a compensation for  
74 reduced knee flexion (Perry & Burnfield, 1992). Here, we challenge the latter claim by  
75 determining how healthy individuals react to kinematically constrained knee flexion. If, as our  
76 earlier data suggest, abduction is not a compensatory motion, then we would expect healthy  
77 individuals to adapt to reduced knee flexion using other compensations, such as increased hip  
78 hiking (pelvic obliquity) or vaulting (increased plantarflexion of contralateral ankle during  
79 swing).

80 In this study, we simulated the mechanical constraints of SKG by restricting knee flexion in  
81 healthy individuals with an adjustable knee brace and observed the resulting compensations.

82 Mechanical induction of gait deviations has been used to successfully quantify gait asymmetry  
83 (Shorter, Polk, Rosengren, & Hsiao-Wecksler, 2008) and evaluate energy expenditure (Hanada  
84 & Kerrigan, 2001). Lewek et al. mechanically induced SKG using a knee brace, finding that such  
85 a constraint results in higher metabolic cost (Lewek, Osborn, & Wutzke, 2012). Here we took a  
86 similar approach, but instead we examined how traditional compensatory parameters vary  
87 between those with post-stroke SKG and those with mechanically induced SKG. We additionally  
88 introduced other factors to more accurately simulate post-stroke gait, for example we matched  
89 walking speeds and added an ankle-foot orthosis commonly worn by individuals post-stroke.  
90 We predicted that more energy efficient compensations to reduce knee flexion, i.e. hip hiking,  
91 would facilitate foot clearance instead of abduction in healthy individuals. Differing reactions  
92 between post-stroke and restricted healthy individuals to similar knee motion would suggest  
93 that hip abduction is not a compensation for reduced knee flexion. This work distinguishes the  
94 impairment-related and compensatory joint motions in post-stroke gait, which will lead to  
95 improved clinical assessments and targeted therapy.

96

## 97 **Methods**

98 Twelve unimpaired healthy individuals with no prior musculoskeletal injury gave written  
99 informed consent according to the guidelines approved by the University of Texas at Austin  
100 Institutional Review Board to participate in the experiment (Table S1).

101 The goal was to simulate the kinematic constraints of those with SKG in the unimpaired  
102 individuals and then compare with recorded data collected from participants with post-stroke

103 SKG in previous study, where all participants were left-sided hemiparetics with knee range of  
104 motion at least 16° less on the effected side during swing phase (Sulzer et al., 2010). Since all  
105 patients had reduced knee flexion angle during swing, we restricted the knee with a  
106 commercial knee brace (Comfortland Medical, Mebane, NC) with a range-of-motion setting  
107 nominally at 0°. Since half of our patient sample wore an ankle-foot orthosis (AFO), we  
108 incorporated a commonly used AFO (Ossur, Reykjavík, Iceland) setting the ankle in a neutral,  
109 90° ankle flexion position. Both orthoses were implemented on the left side to match the  
110 patient sample. We also further imitated our sample by matching gait speeds at 0.5 m/s. Thus,  
111 we used a 2×2×2 factorial design consisting of the factors of knee restriction, ankle restriction  
112 and walking speed. All subjects walked on a split-belt force treadmill (Bertec, Columbus, OH),  
113 which recorded ground reaction forces. Lower limb kinematic data were collected using an  
114 optical motion capture system (PhaseSpace Motion Capture, San Leandro, CA). Each of the  
115 three experimental factors consisted of two levels resulting in eight total conditions. Each  
116 healthy participant walked for three minutes for each condition, approximately 150 steps for  
117 slow walking speed and 200 steps for normal walking speed without receiving any prior  
118 practice. The *Restricted* condition consisted of both knee restriction and ankle restriction. The  
119 knee brace restriction was also implemented without the use of an AFO (*Brace*), and conversely  
120 the AFO was implemented without knee brace restriction (*AFO*). Lastly, subjects walked with no  
121 restriction at all while wearing the brace (*Free*). Each condition was implemented with slow (0.5  
122 m/s) and normal (1 m/s) walking speeds, representing the walking speed of the post-stroke SKG  
123 cohort and typical comfortable healthy walking speed, respectively. The order of the conditions  
124 was randomized. Motion capture data was collected at 240 Hz and force measures from the

125 instrumented treadmill were collected at 1 kHz. Figure 1 shows the representative overview of  
126 experimental setup demonstrating the *Restricted* condition. The data of nine individuals with  
127 post-stroke SKG collected from the baseline stage of previous study (Sulzer et al., 2010) was  
128 used to represent post-stroke SKG where participants walked at 0.5 m/s for two minutes.

### 129 *Kinematic and Spatiotemporal Measures*

130 Data was separated into gait cycles using left heel strikes for each participant corresponding to  
131 the given condition-speed pair. The heel-strike was detected using the instrumented split-belt  
132 treadmill based on a vertical force threshold of 10 N. The first 20 gait cycles were discarded to  
133 account for adaptation to the condition. Knee flexion, ankle plantarflexion and hip abduction  
134 angles of the ipsilateral (constrained/paretic) and contralateral (unconstrained/non-paretic)  
135 sides along with pelvic obliquity was extracted from a random selection of 25 gait cycles of each  
136 healthy participant for each condition to match the number of gait cycles collected from the  
137 individuals with post-stroke SKG from the previous experiment. We quantified hip  
138 circumduction as the hip abduction angle as opposed to the lateral displacement of malleolus  
139 (Lehmann, Condon, & Price, 1987) and coronal thigh angle (D Casey Kerrigan et al., 2000). The  
140 hip hiking is quantified by the coronal angle of the pelvis defined as pelvic obliquity (Michaud,  
141 Gard, & Childress, 2000). Range-of-motion (ROM) for each movement was defined as the  
142 difference between minimum and maximum joint angle measures in positive directions during  
143 pre-swing and swing phases of the gait cycle. The contralateral plantarflexion angle at toe-off  
144 was extracted to measure the amount of vaulting. Spatiotemporal characteristics were  
145 obtained including maximum toe height, maximum toe width, and toe height and width at  
146 minimum toe clearance from the ipsilateral (constrained/paretic) side (Figure 2). The maximum

147 toe height was defined as the maximum vertical displacement of the toe marker. Maximum toe  
148 width was defined as the maximum lateral displacement of toe marker. Minimum toe clearance  
149 was quantified as the local minimum vertical displacement during swing phase (Winter, 1991).  
150 Finally, toe width at minimum toe clearance was quantified as the lateral displacement of toe  
151 marker at minimum toe clearance. Step asymmetry was quantified by the ratios of pre-swing  
152 times and swing times between ipsilateral (constrained/paretic) and contralateral  
153 (unconstrained/non-paretic) sides (Figure 2). Swing and pre-swing ratios were calculated by the  
154 ratio between swing phases of opposite limbs and the ratio between the durations in double  
155 support periods prior to swing of the corresponding limb respectively.

156

### 157 *Statistical Analysis*

158 The collected data was analyzed using a linear mixed model (lme4) package (R Development  
159 Core Team, 2008). The first model included only the healthy participant pool. This model  
160 included the ROM measures from knee flexion, hip abduction and ankle plantarflexion of  
161 ipsilateral (constrained/paretic) side, and pelvic obliquity and spatiotemporal measures as  
162 dependent variables, with fixed effects of knee restriction, ankle restriction and walking speed.  
163 A linear mixed-effects model using the aforementioned factors, participant as a random effect  
164 and followed by Tukey-Kramer *post hoc* testing to evaluate the significance of the differences in  
165 the outcome variables between factors ( $\alpha < 0.05$ ).

166 The second model implemented the same linear mixed-effects model with the healthy  
167 participant pool at slow walking speed (0.5 m/s) with *Free* and *Brace* conditions as well as  
168 people with post-stroke SKG. We have accounted for repeated measures between *Free* and



169 *Brace* conditions within the healthy group in this model using the same labels for the  
170 participants. Similar to the analysis in healthy individuals, we conducted Tukey-Kramer *post hoc*  
171 testing with the joint angle ROM measures and spatiotemporal measures as dependent  
172 variables. We examined differences between the participants with post-stroke SKG from the  
173 previously collected data and the two healthy conditions at matched speeds (*Free* and *Brace*).

174 We ran the Shapiro-Wilk normality test for all the outcome measures within corresponding  
175 factors for the first model and corresponding groups for the second model to confirm the  
176 normality of the data sets ( $p > 0.05$ ).

177

## 178 **Results**

### 179 *Comparisons within healthy individuals*

180 Average gait trajectories for all the aforementioned kinematic measures for all subjects in  
181 *Free*, *Brace*, *AFO* and *Restricted* conditions with slow and normal walking speeds are shown in  
182 Figure 3. A summary of the outcome measures for each condition can be found in Table S2. The  
183 following highlights the statistical comparisons based on the linear-mixed model.

184 We observed a main effect of knee restriction on knee flexion ROM ( $F_{(1,76)} = 158, p < .001$ )  
185 and ankle flexion ROM ( $F_{(1,76)} = 16.4, p < .001$ ), both reduced significantly in *Brace* condition ( $t =$   
186  $-12.6, p < .001, t = 4.35, p < .001$ , respectively) compared to *Free* condition. Knee restriction also  
187 affected pelvic obliquity ( $F_{(1,76)} = 17.1, p < .001$ ) but there was no significant difference in hip  
188 abduction ( $F_{(1,76)} = 2.27, p = .136$ ). For instance, pelvic obliquity ROM increased in *Brace*  
189 condition compared to the *Free* condition ( $t = 5.26, p < .001$ ). We observed the main effect of

190 ankle restriction on ankle plantarflexion ROM ( $F_{(1,76)} = 6.00, p = .017$ ), significantly reduced  
191 from the *Free* condition to the *AFO* condition ( $t = -2.61, p = .006$ ). As expected, ankle restriction  
192 did not affect compensatory parameters such as hip abduction ( $F_{(1,76)} = 0.01, p = .908$ ) or pelvic  
193 obliquity ( $F_{(1,76)} = 0.41, p = .53$ ). Vaulting was not affected by knee restriction ( $F_{(1,76)} = 0.05, p =$   
194  $.824$ ) or ankle restriction ( $F_{(1,76)} = 0.14, p = .708$ ). When comparing the joint angle ROM  
195 measures between the *Brace* and *Restricted* conditions, i.e. the interactive effect of the ankle  
196 and knee restriction, there was no significant interaction effect for any of the measures ( $p >$   
197  $.05$ ).

198 As expected, walking speed affected multiple kinematic variables, including knee flexion  
199 ROM ( $F_{(1,76)} = 9.46, p = .003$ ) and ankle flexion ( $F_{(1,76)} = 5.07, p = .042$ ), both decreased  
200 significantly in slow walking speed ( $t = -3.07, p = .003, t = -2.06, p < .042$ , respectively).  
201 However, we did not observe any significant interactive effects between the walking speed and  
202 restrictions on knee and ankle ( $p > .05$ ). That is, the change in speed did not modulate the  
203 relations between kinematic variables reported above.

204 Maximum step height was significantly affected by knee restriction ( $F_{(1,76)} = 15.94, p < .001$ )  
205 and toe height at minimum toe clearance (HMTC) was significantly affected by ankle restriction  
206 ( $F_{(1,76)} = 6.91, p < .010$ ). The maximum step height was significantly decreased in *Brace*  
207 condition ( $t = -3.84, p < .001$ ) compared to the *Free* condition, whereas HMTC was significantly  
208 increased in *AFO* ( $t = 2.41, p < .018$ ) condition compared to *Free* condition. On the other hand,  
209 the maximum step width was significantly affected by knee restriction ( $F_{(1,76)} = 6.25, p = .015$ )  
210 whereas no significant effect was observed in ankle restriction ( $F_{(1,76)} = 0.01, p = .918$ ). The  
211 maximum step width was increased in the *Brace* condition ( $t = 2.45, p = .017$ ) compared to the

212 *Free* condition. In terms of gait symmetry, the swing-time ratio was only affected by knee  
213 restriction ( $F_{(1,76)} = 14.94, p < .001$ ) and pre-swing time ratio was only affected by ankle  
214 restriction ( $F_{(1,1959)} = 5.68, p = .012$ ). The swing time ratio was significantly increased in the *Brace*  
215 condition ( $t = 3.86, p < .001$ ) and the pre-swing time ratio was significantly decreased in the  
216 *AFO* condition ( $t = -2.38, p = .020$ ) compared to the *Free* condition.

217 As expected, walking speed affected multiple spatiotemporal measures, including maximum  
218 step height ( $F_{(1,76)} = 14.5, p < .001$ ) and HMTC ( $F_{(1,76)} = 10.1, p = .002$ ), both decreasing  
219 significantly in slow walking speed ( $t = -3.78, p = .003, t = -3.22, p < .002$ , respectively). We did  
220 not observe any significant interactive effects between the walking speed and restrictions on  
221 knee and ankle ( $p > .05$ ) for spatiotemporal measures, similar to the interactive effects between  
222 walking speed and knee and ankle joint ROM measures.

223

#### 224 *Comparisons to post-stroke SKG*

225 We compared the kinematic and spatiotemporal outcomes between the *Brace* and *Free*  
226 walking conditions at slow walking speeds and the post-stroke SKG group walking at the same  
227 speed. Our analysis only focused on the *Brace* condition because it is a more well-controlled  
228 condition compared to both ankle and knee restriction. Furthermore, *post-hoc* analysis did not  
229 indicate any significant differences between the *Brace* and *Restricted* conditions for kinematic  
230 and spatiotemporal outcome measures. Gait trajectories are illustrated in Figure 4 and  
231 corresponding ROM measures were shown in Supplementary Figure 1 and statistical

232 comparisons between groups are shown in Table 1. The following is a summary of the statistical  
233 comparisons in selected parameters.

234 The knee flexion ROM in the *Brace* condition and *SKG* were not significantly different ( $t =$   
235  $0.73, p = .467$ ) but the *SKG* group was significantly lower than the *Free* condition ( $t = 8.88, p =$   
236  $.001$ ). Similarly, there were no significant differences in ankle plantarflexion ROM between the  
237 *Brace* condition and *SKG* ( $t = 0.26, p = .788$ ). However, the *Free* condition had significantly  
238 higher ankle plantarflexion compared to the *SKG* group ( $t = 2.78, p < .013$ ). There was no  
239 significant difference in pelvic obliquity ROM between the *Brace* condition and *SKG* group  
240 ( $t=3.02, p = .103$ ) but the *SKG* group was significantly higher than the *Free* condition ( $t = 5.25, p$   
241  $< .001$ ). In addition, hip abduction in post-stroke *SKG* was significantly higher than the *Brace*  
242 condition ( $t= 2.52, p = .012$ ). There was no significant difference in vaulting between the *SKG*  
243 group and *Brace* condition ( $t = 0.53, p = .585$ ) or between the *SKG* group and *Free* condition ( $t=$   
244  $0.93, p = .351$ ).

245 Spatiotemporal characteristics differed between groups. The maximum toe height was  
246 significantly higher for the *Free* condition compared to the *SKG* ( $t= 4.99, p < .001$ ). Maximum  
247 toe width in the *Free* condition was significantly lower than the *SKG* group ( $t= 3.13, p < .001$ ).  
248 The toe height at minimum toe clearance in the *SKG* group was significantly higher than both  
249 the *Free* ( $t= 4.08, p < .001$ ) and *Brace* conditions ( $t= 3.49, p < .001$ ). Toe width measures at  
250 minimum toe clearance in *SKG* was significantly higher compared to the *Free* ( $t= 3.79, p < .001$ )  
251 and *Brace* ( $t= 4.38, p < .001$ ) conditions.

252 The pre-swing time ratio in *SKG* group was significantly higher compared to *Free* ( $t= 5.74$ ,  $p$   
253  $< .001$ ) and *Brace* conditions ( $t= 5.34$ ,  $p < .001$ ). Similarly, swing ratio in *SKG* group was  
254 significantly higher than the *Brace* condition ( $t= 7.57$ ,  $p < .001$ ) and the *Free* condition ( $t= 3.92$ ,  
255  $p < .001$ ).

## 256 Discussion

257 Hip abduction has long been assumed to be a compensation for reduced knee flexion angle  
258 during swing, and accordingly, excessive abduction in post-stroke *SKG* has been attributed to  
259 the same mechanism (Perry & Burnfield, 1992) . To test this hypothesis, we applied kinematic  
260 constraints at the knee and ankle in healthy gait to imitate the sagittal plane kinematics of post-  
261 stroke *SKG* and evaluated resulting compensations. In response to reduced knee flexion,  
262 healthy individuals compensated with greater pelvic obliquity with no significant change in hip  
263 abduction, regardless of gait speed. Individuals with post-stroke *SKG* exhibited a similar  
264 increase in pelvic obliquity, but in contrast to healthy individuals with constrained knee flexion,  
265 higher hip abduction was observed. In addition, the minimum toe clearance of people with  
266 post-stroke *SKG* was also higher than those with mechanically induced *SKG*, indicating that the  
267 excessive abduction was not necessary for foot clearance. In summary, our results show that  
268 hip abduction is not a gait compensation for reduced knee flexion angle.

269 Our findings suggest that excessive hip abduction is unnecessary to facilitate swing phase  
270 toe clearance in those after post-stroke *SKG*, strongly questioning its use as a compensatory  
271 motion. Stroke participants exhibited the same sagittal plane joint ROM as healthy individuals  
272 with restricted knee motion and also exhibited the same compensatory motions indicated by

273 the pelvic obliquity ROM. However, in stark contrast to healthy individuals with mechanically  
274 reduced knee flexion, those with post-stroke SKG walked with substantially higher hip  
275 abduction and toe clearance, seemingly with no biomechanical benefit. Previous work has  
276 reported excessive contributions of the ankle plantarflexor (soleus) and abductor muscles  
277 (gluteus medius) during forward propulsion and swing phase of the paretic side during post-  
278 stroke gait, indicating abnormal coordination similar to what we hypothesized (Hall, Peterson,  
279 Kautz, & Neptune, 2011). Our own work revealed that increased knee flexion angle and toe  
280 clearance provided by exoskeletal assistance resulted in greater hip abduction in post-stroke  
281 SKG which could not be accounted by biomechanical factors (Sulzer et al., 2010). Further  
282 analysis suggested that a cross-planar reflex coupling initiated by spastic rectus femoris co-  
283 activated with gluteus medius (Akbas, Neptune, & Sulzer, In review). Thus while excessive hip  
284 abduction should be expected to avoid excessive ankle plantarflexion, for example, during  
285 equinus deformity of the foot (Kinsella & Moran, 2008), the cause of excessive abduction in  
286 those with only reduced knee flexion could be due to non-biomechanical causes such as  
287 abnormal coordination (Brunnström, 1970).

288 Instead of abduction, we found increased pelvic obliquity as the primary compensation for  
289 reduced knee flexion. Earlier work has shown only increased pelvic obliquity during toe-off in  
290 post-stroke gait compared to healthy gait, without any significant changes in hip abduction  
291 (Cruz et al., 2009; Matsuda et al., 2016). Further, in those with post-stroke hemiparesis, pelvic  
292 elevation and knee flexion were inversely correlated with the walking speed, whereas no  
293 correlation was observed with hip abduction (Stanhope, Knarr, Reisman, & Higginson, 2014).  
294 Not only does this evidence suggest that pelvic obliquity is the primary compensation for

295 reduced foot clearance, but additional work indicates the cost of abduction (Shorter et al.,  
296 2017). Increased circumduction magnitude is exponentially correlated with the cost of  
297 metabolic energy during walking (Shorter et al., 2017). Our results in healthy individuals  
298 conclusively add to this literature by directly illustrating that pelvic obliquity is the primary  
299 compensation for reduced knee flexion, whereas hip abduction is not a compensation.

300       There were additional differences between post-stroke and healthy individuals. For  
301 instance, higher temporal asymmetry was observed in post-stroke SKG compared to healthy  
302 gait with restricted knee motion. This difference can be explained by the increased swing time  
303 due to excessive abduction. Increased minimum toe clearance in post-stroke SKG compared to  
304 those with mechanically restricted knee motion indicates an overcompensation following toe-  
305 clearance. This overcompensation could be due to the lack of proprioceptive feedback  
306 following post-stroke hemiparesis (Keenan, Perry, & Jordan, 1983). Alternatively, the increased  
307 toe height at minimum toe clearance could be due to ankle impairments (Basmajian, Kukulka,  
308 Narayan, & Takebe, 1975; Olney, Griffin, Monga, & McBride, 1991).

309       There are limitations to this study that prevent greater generalizations. For instance, we  
310 cannot make conclusions regarding other kinematic abnormalities such as foot drop or the knee  
311 hyperextension prior to swing observed in people with post-stroke SKG. Knee hyperextension  
312 (*genu recurvatum*) and foot drop, while common in SKG, will not increase effective limb length  
313 and thus is a very unlikely contributor to supposed compensatory abduction. Our comparison  
314 was limited to kinematic and spatiotemporal factors and did not simulate motor control or  
315 proprioceptive contributions to gait compensations. While it is feasible that proprioceptive loss

316 could contribute to increased hip abduction in post-stroke SKG, it is unlikely this would result in  
317 such an energetically costly compensation over a long period of time.

318 In conclusion, our data shows that hip abduction is not a necessary compensation for  
319 reduced knee flexion during gait, in direct opposition to widely held beliefs of abduction's  
320 compensatory role. Instead, pelvic obliquity is the primary compensatory motion associated  
321 with reduced swing phase knee flexion ROM. Together with previous findings, these data  
322 suggest that excessive hip abduction in those with post-stroke SKG could originate from a non-  
323 biomechanical cause, such as an abnormal coordination pattern. The correct characterization of  
324 compensation and impairment will lead towards improved treatment strategies and  
325 interventions.



326

## References

- 327 Akbas, T., Neptune, R. R., & Sulzer, J. (In review). Neuromusculoskeletal simulation reveals abnormal  
328 rectus femoris-gluteus medius reflex coupling in post-stroke gait. *Stroke*.
- 329 Basmajian, J., Kukulka, C., Narayan, M., & Takebe, K. (1975). Biofeedback treatment of foot-drop after  
330 stroke compared with standard rehabilitation technique: effects on voluntary control and  
331 strength. *Archives of Physical Medicine and Rehabilitation*, 56(6), 231-236.
- 332 Brunnström, S. (1970). *Movement therapy in hemiplegia: a neurophysiological approach: Facts and*  
333 *Comparisons*.
- 334 Clark, D. J., Ting, L. H., Zajac, F. E., Neptune, R. R., & Kautz, S. A. (2010). Merging of healthy motor  
335 modules predicts reduced locomotor performance and muscle coordination complexity post-  
336 stroke. *Journal of neurophysiology*, 103(2), 844-857.
- 337 Cruz, T. H., & Dhaher, Y. Y. (2008). Evidence of Abnormal Lower-Limb Torque Coupling After Stroke An  
338 Isometric Study. *Stroke*, 39(1), 139-147.
- 339 Cruz, T. H., Lewek, M. D., & Dhaher, Y. Y. (2009). Biomechanical impairments and gait adaptations post-  
340 stroke: multi-factorial associations. *Journal of biomechanics*, 42(11), 1673-1677.
- 341 Finley, J. M., Perreault, E. J., & Dhaher, Y. Y. (2008). Stretch reflex coupling between the hip and knee:  
342 implications for impaired gait following stroke. *Experimental brain research*, 188(4), 529-540.
- 343 Hall, A. L., Peterson, C. L., Kautz, S. A., & Neptune, R. R. (2011). Relationships between muscle  
344 contributions to walking subtasks and functional walking status in persons with post-stroke  
345 hemiparesis. *Clinical biomechanics*, 26(5), 509-515.
- 346 Hanada, E., & Kerrigan, D. C. (2001). Energy consumption during level walking with arm and knee  
347 immobilized. *Archives of physical medicine and rehabilitation*, 82(9), 1251-1254.
- 348 Keenan, M. A., Perry, J., & Jordan, C. (1983). Factors affecting balance and ambulation following stroke.  
349 *Clinical Orthopaedics and Related Research*(182), 165-171.
- 350 Kerrigan, D. C., Frates, E. P., Rogan, S., & Riley, P. O. (2000). Hip hiking and circumduction: quantitative  
351 definitions. *American journal of physical medicine & rehabilitation*, 79(3), 247-252.
- 352 Kerrigan, D. C., Gronley, J., & Perry, J. (1991). Stiff-legged gait in spastic paresis. A study of quadriceps  
353 and hamstrings muscle activity. *American journal of physical medicine & rehabilitation*, 70(6),  
354 294-300.
- 355 Kinsella, S., & Moran, K. (2008). Gait pattern categorization of stroke participants with equinus  
356 deformity of the foot. *Gait & posture*, 27(1), 144-151.
- 357 Lehmann, J. F., Condon, S. M., & Price, R. (1987). Gait abnormalities in hemiplegia: their correction by  
358 ankle-foot orthoses. *Archives of Physical Medicine and Rehabilitation*, 68(11), 763-771.
- 359 Lewek, M. D., Osborn, A. J., & Wutzke, C. J. (2012). The influence of mechanically and physiologically  
360 imposed stiff-knee gait patterns on the energy cost of walking. *Archives of physical medicine and*  
361 *rehabilitation*, 93(1), 123-128.
- 362 Little, V. L., McGuirk, T. E., & Patten, C. (2014). Impaired limb shortening following stroke: what's in a  
363 name? *PloS one*, 9(10), e110140.
- 364 Matsuda, F., Mukaino, M., Ohtsuka, K., Tanikawa, H., Tsuchiyama, K., Teranishi, T., . . . Saitoh, E. (2016).  
365 Analysis of strategies used by hemiplegic stroke patients to achieve toe clearance. *Japanese*  
366 *Journal of Comprehensive Rehabilitation Science*, 7, 111-118.
- 367 Matsuda, F., Mukaino, M., Ohtsuka, K., Tanikawa, H., Tsuchiyama, K., Teranishi, T., . . . Saitoh, E. (2017).  
368 Biomechanical factors behind toe clearance during the swing phase in hemiparetic patients.  
369 *Topics in stroke rehabilitation*, 24(3), 177-182.

- 370 Michaud, S. B., Gard, S. A., & Childress, D. S. (2000). A preliminary investigation of pelvic obliquity  
371 patterns during gait in persons with transtibial and transfemoral amputation. *Journal of*  
372 *rehabilitation research and development*, 37(1), 1-10.
- 373 Neckel, N. D., Blonien, N., Nichols, D., & Hidler, J. (2008). Abnormal joint torque patterns exhibited by  
374 chronic stroke subjects while walking with a prescribed physiological gait pattern. *Journal of*  
375 *neuroengineering and rehabilitation*, 5(1), 19.
- 376 Olney, S. J., Griffin, M. P., Monga, T. N., & McBride, I. D. (1991). Work and power in gait of stroke  
377 patients. *Archives of physical medicine and rehabilitation*, 72(5), 309-314.
- 378 Perry, J., & Burnfield, J. (1992). Gait analysis: normal and pathological function. 1992. *Thorofare, NJ:*  
379 *Slack*.
- 380 Shorter, K. A., Polk, J. D., Rosengren, K. S., & Hsiao-Wecksler, E. T. (2008). A new approach to detecting  
381 asymmetries in gait. *Clinical Biomechanics*, 23(4), 459-467.
- 382 Shorter, K. A., Wu, A., & Kuo, A. D. (2017). The high cost of swing leg circumduction during human  
383 walking. *Gait & Posture*, 54, 265-270.
- 384 Stanhope, V. A., Knarr, B. A., Reisman, D. S., & Higginson, J. S. (2014). Frontal plane compensatory  
385 strategies associated with self-selected walking speed in individuals post-stroke. *Clinical*  
386 *Biomechanics*, 29(5), 518-522.
- 387 Sulzer, J. S., Gordon, K. E., Dhaher, Y. Y., Peshkin, M. A., & Patton, J. L. (2010). Preswing knee flexion  
388 assistance is coupled with hip abduction in people with stiff-knee gait after stroke. *Stroke*, 41(8),  
389 1709-1714.
- 390 Winter, D. A. (1991). *Biomechanics and motor control of human gait: normal, elderly and pathological*.
- 391

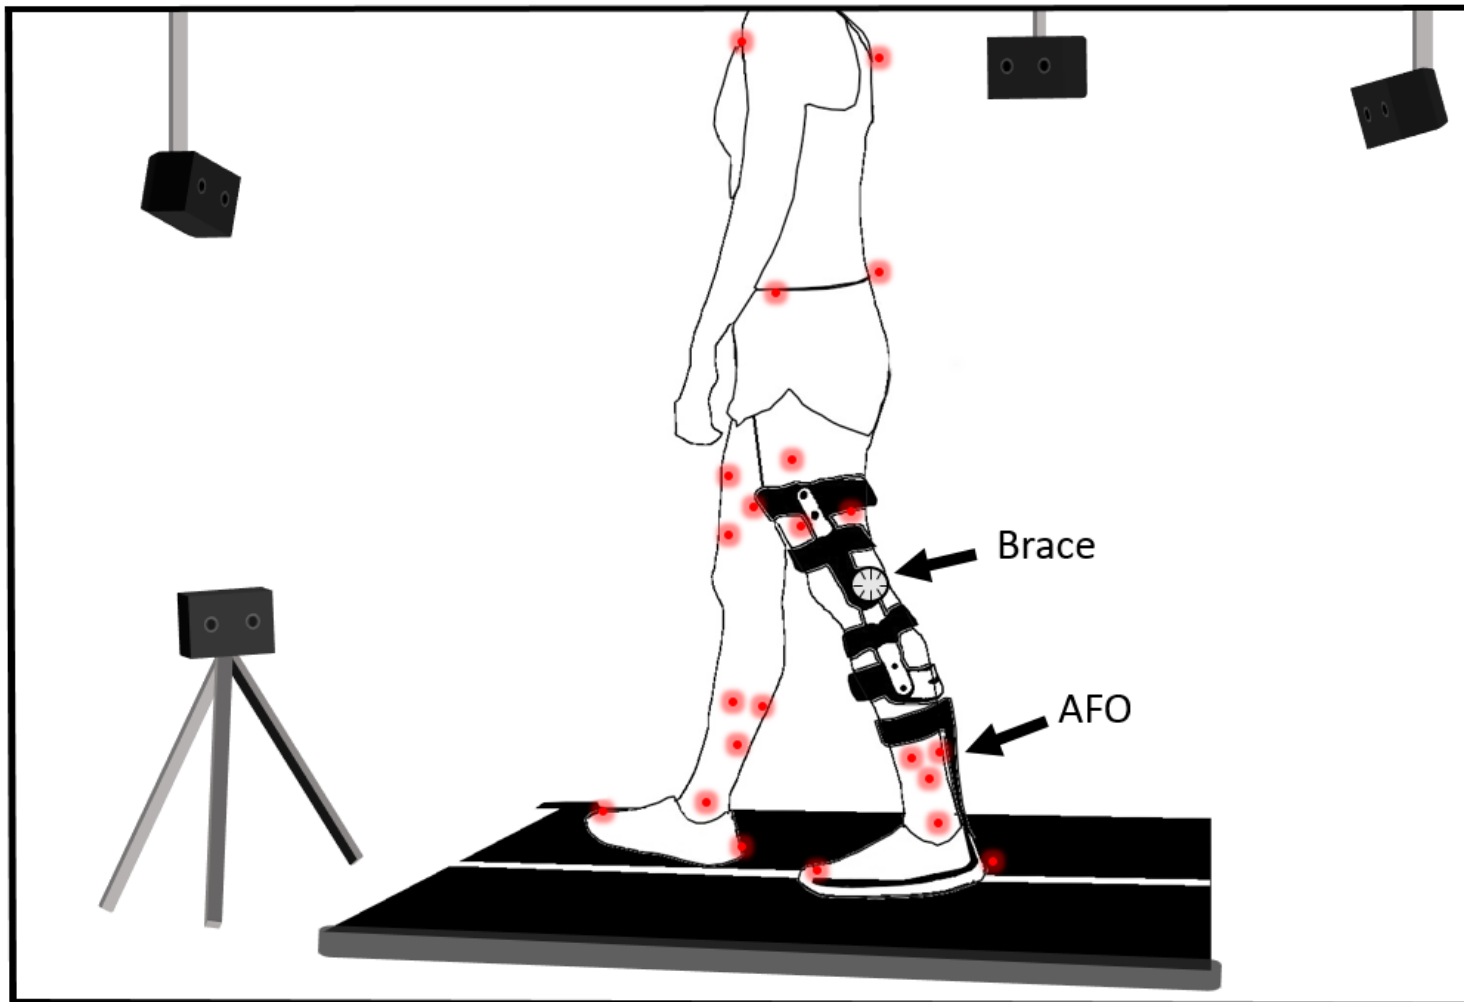

**Figure 1: Schematic of experimental setup of mechanically induced SKG.** A commercial medical knee brace and ankle foot orthosis (AFO) are used to imitate reduced knee flexion and orthotic assistance in post-stroke SKG, respectively. For the *Free* condition, the AFO and flexion angle constraint on the knee brace were removed, whereas for the *Brace* condition only the AFO was removed, and for the *AFO* condition only the flexion angle constraint was removed. Position of individual body segments was recorded with active LED markers (shown in red circles) via infrared cameras and gait events were detected using the force measures from the instrumented split-belt treadmill.

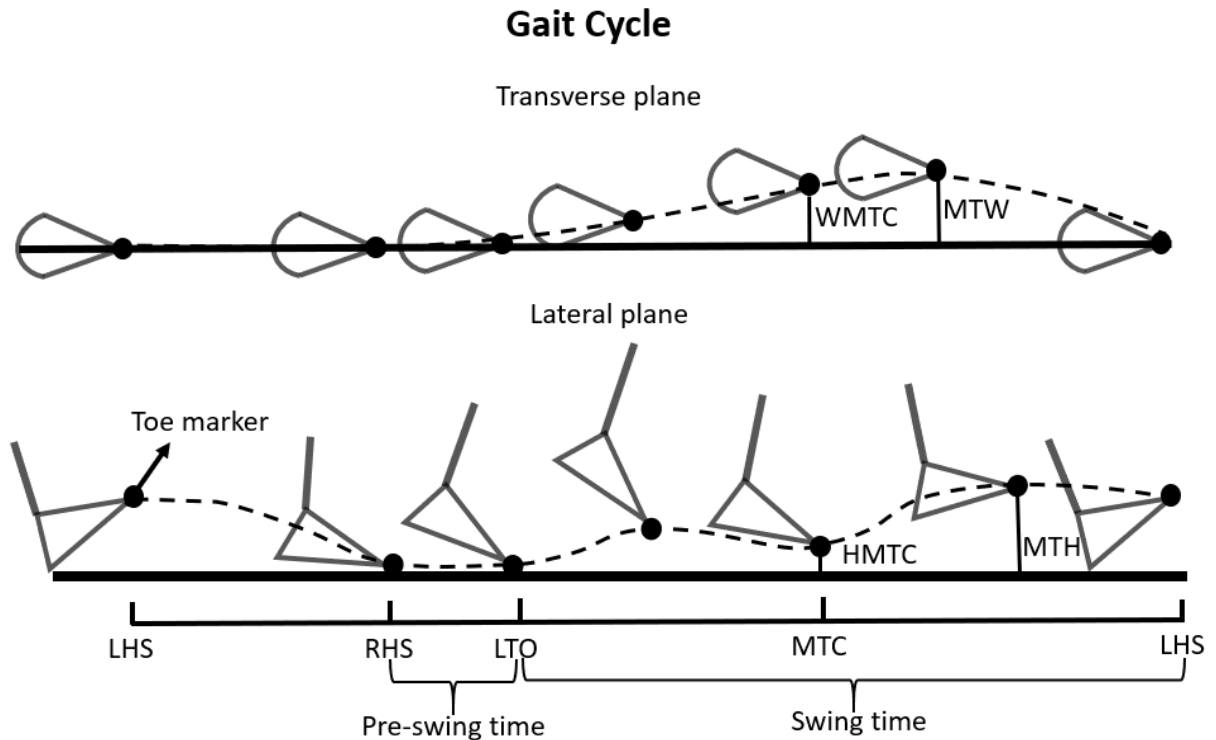

**Figure 2: Selected spatiotemporal gait measures illustrated by left toe marker trajectory from lateral and transverse plane views.** Maximum toe height (MTH), maximum toe width (MTW) and toe height (HMTc) and width (WMTC) measures at minimum toe clearance were obtained using the toe marker at the corresponding time instances during swing of the constrained/paretic side. The ratio of swing times (SR) and pre-swing times (PR) between constrained/paretic and unconstrained/non-paretic sides were used to measure gait asymmetry.

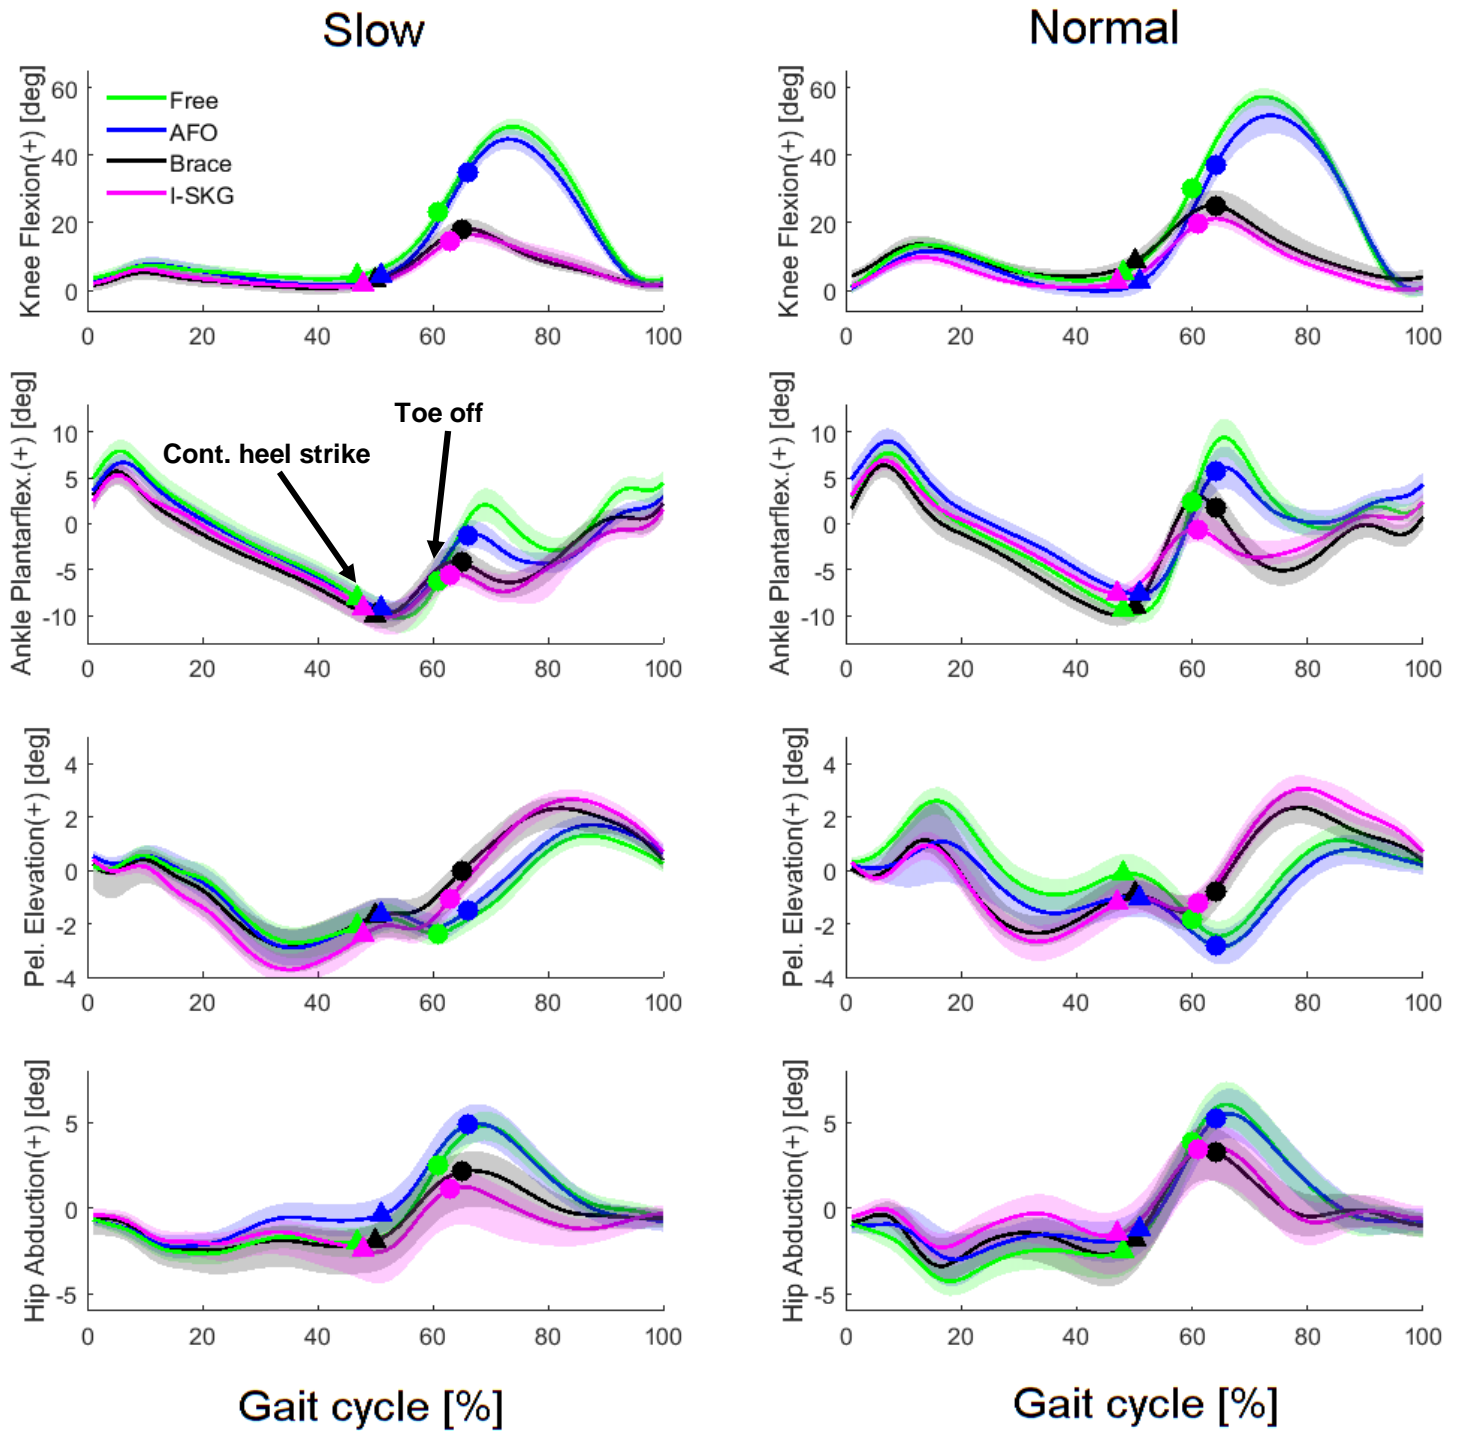

**Figure 3: Healthy individuals compensate with increased pelvic obliquity and decreased ankle plantarflexion in response to reduced knee flexion.** The knee flexion, ankle plantarflexion, pelvic obliquity and hip abduction angles for the constrained side under different conditions (*Free, AFO, Brace and Restricted*) are given for slow (left) and normal (right) walking speeds. The mean values and the standard errors are shown by solid lines and shaded areas, respectively.

Contralateral heel strike is delineated by triangles and toe-off by circles. Regardless of walking speed, the introduction of knee restriction increased pelvic obliquity and decreased hip abduction in healthy controls.

Figure 4

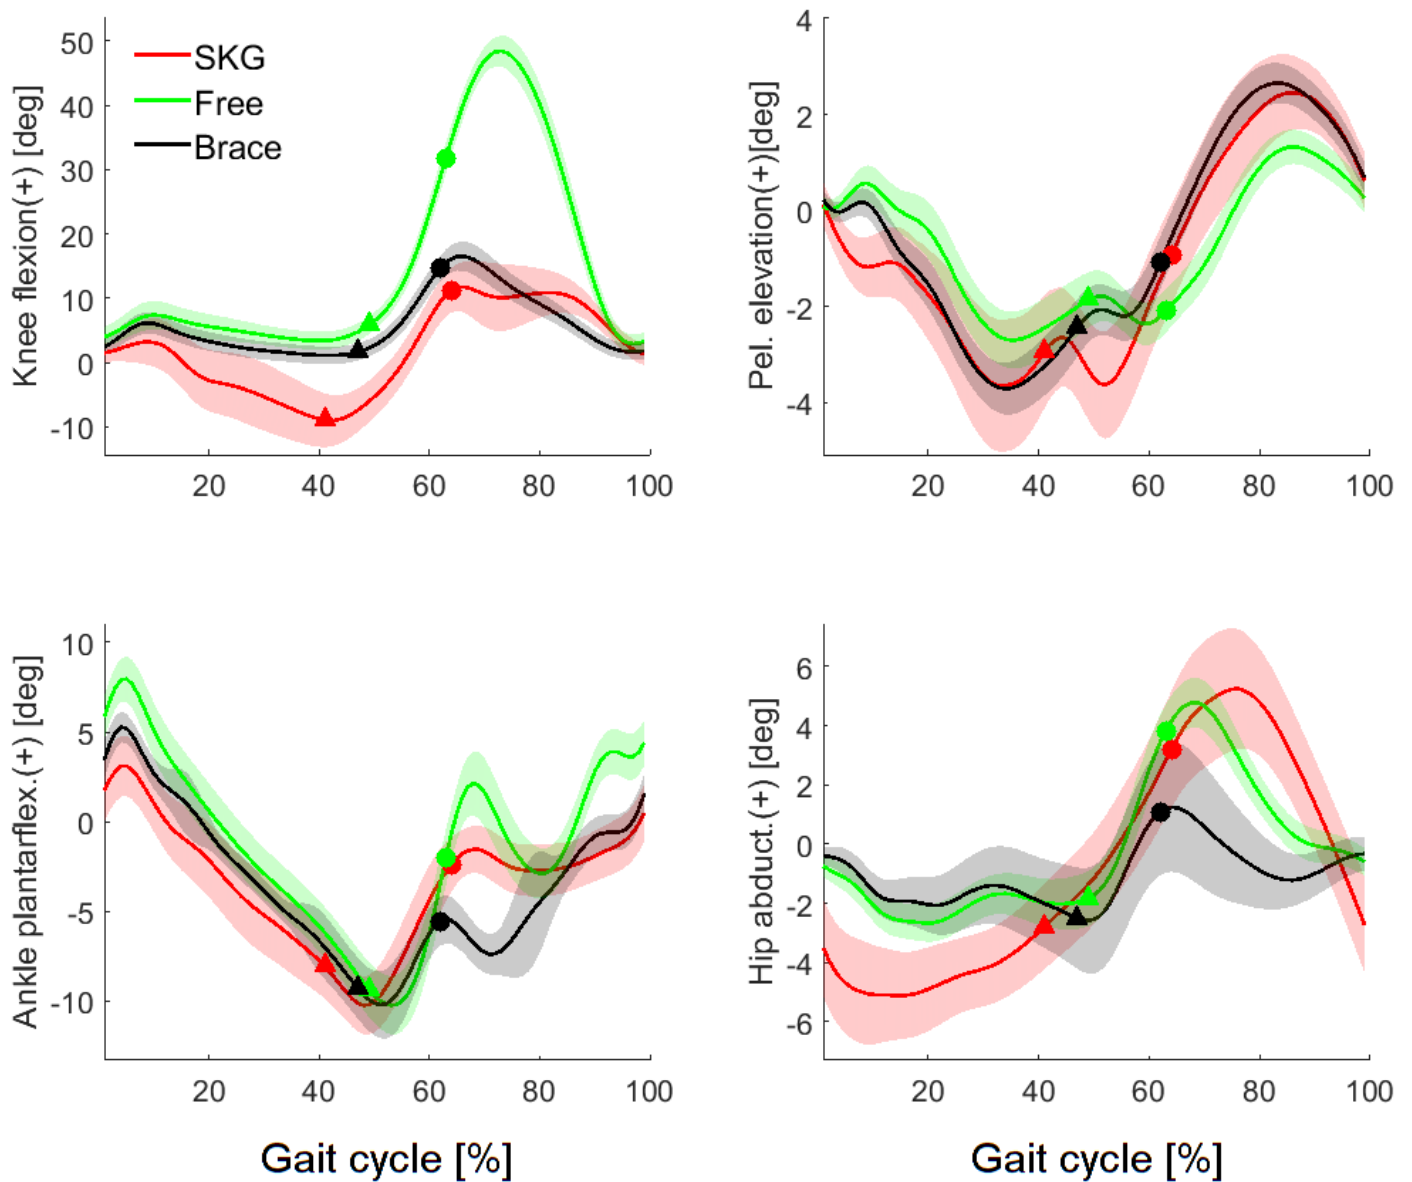

Figure 4: Increased hip abduction angle in stroke contrasts with decreased abduction in the

**Brace condition.** The knee flexion, hip abduction and ankle flexion angles for the

constrained/paretic side and pelvic obliquity for healthy individuals with *Free* and *Brace*

conditions speed-matched with people with post-stroke SKG. The standard errors are shown by

shaded areas. Contralateral heel strike is delineated by triangles and toe-off by circles. Note that

despite similar knee flexion between the *Brace* condition and *SKG* group, the *Brace* condition resulted in reduced hip abduction while the *SKG* group had increased hip abduction.



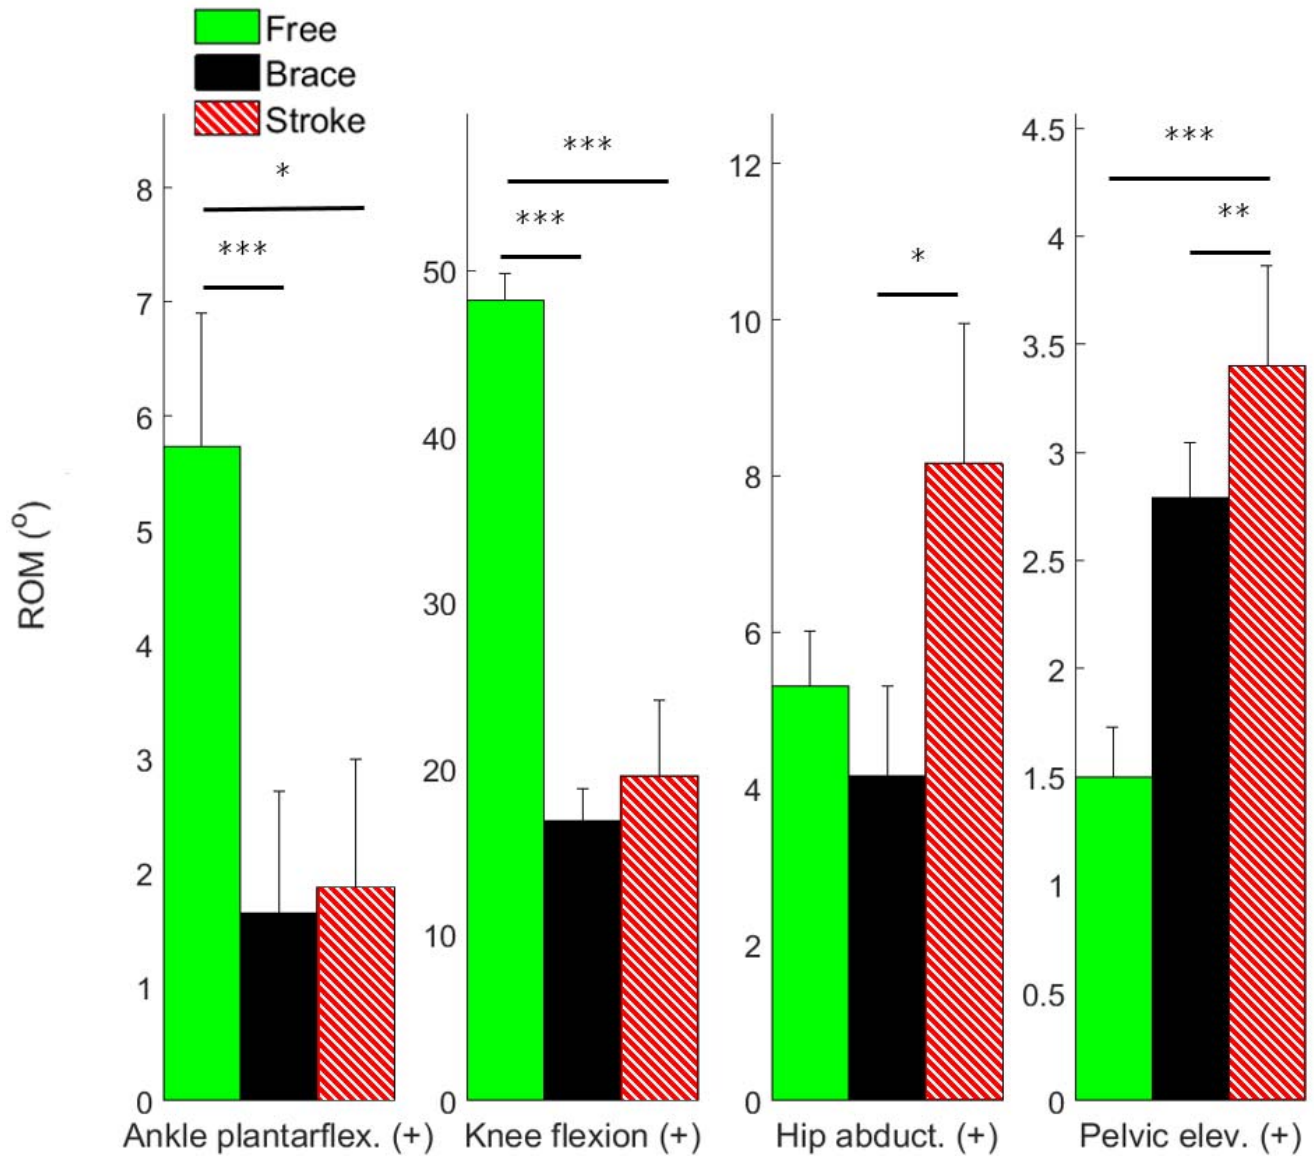

**Figure S1: Similar responses in pelvic obliquity of *Brace* condition and post-stroke SKG but increased hip abduction in stroke gait.** The bar graphs and the error bars represent the mean ROM values and standard errors respectively for knee flexion, ankle plantarflexion, hip abduction for constrained/paretic side and pelvic elevation in healthy individuals with *Free* and *Brace* conditions and stroke group. The level of significance between groups for given outcome measure were indicated on the lines connecting corresponding box plots (\*  $p < 0.05$ , \*\*  $p < 0.01$ , \*\*\*  $p < 0.001$ ).

## Tables

| Outcome measure         |                                             | Group | Free                           | Brace                          | SKG                            |
|-------------------------|---------------------------------------------|-------|--------------------------------|--------------------------------|--------------------------------|
|                         |                                             |       |                                |                                |                                |
| Kinematic measures      | Knee ROM (°)                                |       | 48.2 ± 5.76 <sup>†††,†††</sup> | 16.9 ± 6.57 <sup>†††</sup>     | 19.6 ± 13.5 <sup>†††</sup>     |
|                         | Hip abd. ROM(°)                             |       | 5.31 ± 2.46                    | 4.16 ± 3.98 <sup>*</sup>       | 8.16 ± 5.37 <sup>*</sup>       |
|                         | Pel obl. ROM(°)                             |       | 1.50 ± 0.80 <sup>††,†††</sup>  | 2.79 ± 0.88 <sup>††</sup>      | 3.40 ± 1.40 <sup>†††</sup>     |
|                         | Ankle ROM(°)                                |       | 5.73 ± 4.04 <sup>†††,†</sup>   | 1.64 ± 3.72 <sup>†††</sup>     | 1.87 ± 3.37 <sup>†</sup>       |
|                         | Peak contralateral ankle plantarflexion (°) |       | 4.62 ± 3.40                    | 5.21 ± 3.65                    | 5.51 ± 5.86                    |
| Spatiotemporal measures | Max. toe height (mm)                        |       | 79.9 ± 42.1 <sup>†††,†††</sup> | 49.0 ± 17.6 <sup>†††</sup>     | 35.7 ± 11.5 <sup>†††</sup>     |
|                         | Max. toe clearance (mm)                     |       | 9.41 ± 5.58 <sup>†††,†††</sup> | 10.9 ± 7.86 <sup>†††,**</sup>  | 21.1 ± 9.09 <sup>†††,**</sup>  |
|                         | Max. toe width (mm)                         |       | 29.1 ± 9.12 <sup>†††,†††</sup> | 39.5 ± 11.5 <sup>†††</sup>     | 59.1 ± 40.5 <sup>†††</sup>     |
|                         | Width at min. toe clearance (mm)            |       | -8.82 ± 12.7 <sup>†††</sup>    | -15.9 ± 13.4 <sup>***</sup>    | 40.1 ± 46.8 <sup>†††,***</sup> |
|                         | Swing ratio                                 |       | 0.99 ± 0.05 <sup>†††,†††</sup> | 1.20 ± 0.14 <sup>†††,***</sup> | 1.37 ± 0.13 <sup>†††,***</sup> |
|                         | Pre-swing ratio                             |       | 1.03 ± 0.09 <sup>†††</sup>     | 1.02 ± 0.10 <sup>***</sup>     | 1.43 ± 0.27 <sup>†††,***</sup> |

**Table 1: Summary of the joint angle ROM and spatiotemporal gait measures for healthy gait**

**with and without knee brace restriction and post-stroke SKG.** The measures indicate the mean values and standard deviations. The level of significance between *SKG* and *Brace* condition is denoted as \*  $p < 0.05$ , \*\*  $p < 0.01$ , \*\*\*  $p < 0.001$ ; between *Brace* and *Free* conditions denoted as ‡  $p < 0.05$ , ††  $p < 0.01$ , †††  $p < 0.001$ ; and between *Free* and *SKG* conditions denoted as †  $p < 0.05$ , ††  $p < 0.01$ , †††  $p < 0.001$ .

**Table S1- Demographics of healthy participants**

| Subject no | Age (yrs) | G | W (lb.) | H (in) | Dominant Side |
|------------|-----------|---|---------|--------|---------------|
| 1          | 29        | M | 123     | 65     | R             |
| 2          | 26        | M | 163     | 69     | R             |
| 3          | 21        | M | 135     | 66     | R             |
| 4          | 24        | M | 119     | 66     | R             |
| 5          | 28        | F | 164     | 71     | R             |
| 6          | 19        | F | 105     | 62     | R             |
| 7          | 28        | M | 210     | 75     | R             |
| 8          | 27        | F | 137     | 68     | R             |
| 9          | 33        | M | 220     | 72     | L             |
| 10         | 22        | M | 145     | 69     | R             |
| 11         | 25        | M | 145     | 69     | R             |
| 12         | 28        | M | 176     | 68     | R             |
| Mean       | 25.8      |   | 153     | 68.3   |               |
| SD         | 3.88      |   | 35.1    | 3.42   |               |

---

| Outcome measure         |                                             | Group       | Free         | AFO          | Brace        | Restricted   |
|-------------------------|---------------------------------------------|-------------|--------------|--------------|--------------|--------------|
|                         |                                             |             |              |              |              |              |
| Kinematic measures      | Knee ROM (°)                                | Slow        | 48.2 ± 5.76  | 46.8 ± 6.86  | 16.9 ± 6.57  | 16.95 ± 7.09 |
|                         |                                             | Normal      | 56.1 ± 6.71  | 57.47 ± 7.10 | 21.73 ± 6.56 | 22.05 ± 6.94 |
|                         | Hip abd. ROM(°)                             | Slow        | 5.31 ± 2.46  | 5.46 ± 3.30  | 4.16 ± 3.98  | 4.24 ± 4.24  |
|                         |                                             | Normal      | 6.31 ± 4.24  | 5.08 ± 3.52  | 4.78 ± 3.21  | 4.86 ± 4.86  |
|                         | Pel obl. ROM(°)                             | Slow        | 1.50 ± 0.80  | 1.97 ± 0.89  | 2.79 ± 0.88  | 2.80 ± 0.94  |
|                         |                                             | Normal      | 1.40 ± 0.93  | 1.18 ± 0.84  | 2.82 ± 1.41  | 3.27 ± 1.49  |
|                         | Ankle ROM(°)                                | Slow        | 5.73 ± 4.04  | 3.72 ± 4.22  | 1.64 ± 3.72  | 1.61 ± 3.66  |
|                         |                                             | Normal      | 9.48 ± 6.83  | 6.26 ± 4.63  | 6.08 ± 5.07  | 3.47 ± 3.79  |
|                         | Peak contralateral ankle plantarflexion (°) | Slow        | 4.62 ± 3.40  | 4.61 ± 2.43  | 5.21 ± 3.65  | 3.75 ± 3.18  |
|                         |                                             | Normal      | 5.04 ± 3.31  | 4.92 ± 3.64  | 4.67 ± 2.75  | 5.68 ± 3.49  |
| Spatiotemporal measures | Max. toe height (mm)                        | Slow        | 79.9 ± 42.1  | 65.8 ± 12.3  | 49.0 ± 17.6  | 54.7 ± 13.1  |
|                         |                                             | Normal      | 103 ± 42.2   | 86.3 ± 12.4  | 66.4 ± 16.9  | 62.8 ± 21.8  |
|                         | Max. toe clearance (mm)                     | Slow        | 9.41 ± 5.58  | 15.5 ± 5.73  | 10.9 ± 7.86  | 13.3 ± 4.26  |
|                         |                                             | Normal      | 13.82 ± 7.77 | 19.6 ± 8.86  | 17.0 ± 6.44  | 18.9 ± 12.6  |
|                         | Max. toe width (mm)                         | Slow        | 29.1 ± 9.12  | 29.3 ± 9.61  | 39.5 ± 11.5  | 38.5 ± 14.5  |
|                         |                                             | Normal      | 28.7 ± 10.2  | 32.5 ± 15.7  | 42.8 ± 20.0  | 44.1 ± 25.8  |
|                         | Width at max. toe clearance (mm)            | Slow        | -8.82 ± 12.7 | -11.4 ± 14.8 | -15.9 ± 13.4 | -22.6 ± 20.4 |
|                         |                                             | Normal      | -7.09 ± 14.3 | -9.18 ± 25.1 | -26.3 ± 28.2 | -25.1 ± 45.1 |
|                         | Swing ratio                                 | Slow        | 0.99 ± 0.05  | 1.07 ± 0.07  | 1.20 ± 0.14  | 1.20 ± 0.09  |
|                         |                                             | Normal      | 1.01 ± 0.04  | 1.02 ± 0.05  | 1.12 ± 0.17  | 1.21 ± 0.20  |
| Pre-swing ratio         | Slow                                        | 1.03 ± 0.09 | 0.93 ± 0.09  | 1.02 ± 0.10  | 0.97 ± 0.15  |              |
|                         | Normal                                      | 0.94 ± 0.06 | 0.89 ± 0.05  | 1.01 ± 0.12  | 0.98 ± 0.15  |              |

**Table S2: Summary of the joint angle ROM and spatiotemporal gait measures for healthy gait**

**for Free, AFO, Brace and Restricted conditions with slow and normal walking speeds.** The measures indicate the mean values and standard deviations. Due to the large complexity of markings, statistical comparisons are not noted on the table. Please see the text for the highlighted comparisons.
